# Supplementary material for: Towards omics-based predictions of planktonic functional composition from environmental data
Source: PubMed Central journal article supplement (PMC8285379; doi:10.1038/s41467-021-24547-1), 2021-07-16
Supplement: 41467_2021_24547_MOESM3_ESM.pdf [file 41467_2021_24547_MOESM3_ESM.pdf]

1 File Name: Supplementary Data 1

2 Description: List of Kegg metabolic pathways detected in protein functional clusters (PFCs).

3 The number of occurrences in the 233,756 PFCs and in the 14,585 PFCs highly linked to

4 environmental gradients (hlePFCs) are given for each pathway. The percentage of

5 occurrences among hlePFCs is also given for each pathway, reflecting how the pathway was

6 selected by our random forest approach.

7

8 File Name: Supplementary Data 2

9 Description: Description of the 52 environmental variables used in the study.
